# Supplementary material for: Electrochemical Sensing of α-Fetoprotein Based on Molecularly Imprinted Polymerized Ionic Liquid Film on a Gold Nanoparticle Modified Electrode Surface
Source: MDPI journal article supplement (doi:10.3390/s19143218), 2019-07-22
Supplement: s1 [file s1]

**High-performance platform for electrochemical sensing  $\alpha$ -fetoprotein based on  
molecularly imprinted polymerized ionic liquid film on a gold nanoparticle  
modified electrode surface**

Yingying Wu<sup>b,1</sup>, Yanying Wang<sup>b,1</sup>, Xing Wang<sup>b</sup>, Chen Wang<sup>b</sup>, Chunya Li<sup>b,\*</sup>, Zhengguo Wang<sup>a,\*</sup>

*<sup>a</sup>Institute of Food Science and Engineering Technology, Hezhou University, Hezhou, Guangxi 542899, China*

*<sup>b</sup>Key Laboratory of Analytical Chemistry of the State Ethnic Affairs Commission, College of Chemistry and Materials Science, South-Central University for Nationalities, Wuhan 430074, China*

**\* Corresponding Author.**

E-mail: lichychem@163.com & wangzghz@sina.com.

<sup>1</sup>These authors contributed equally to this work.

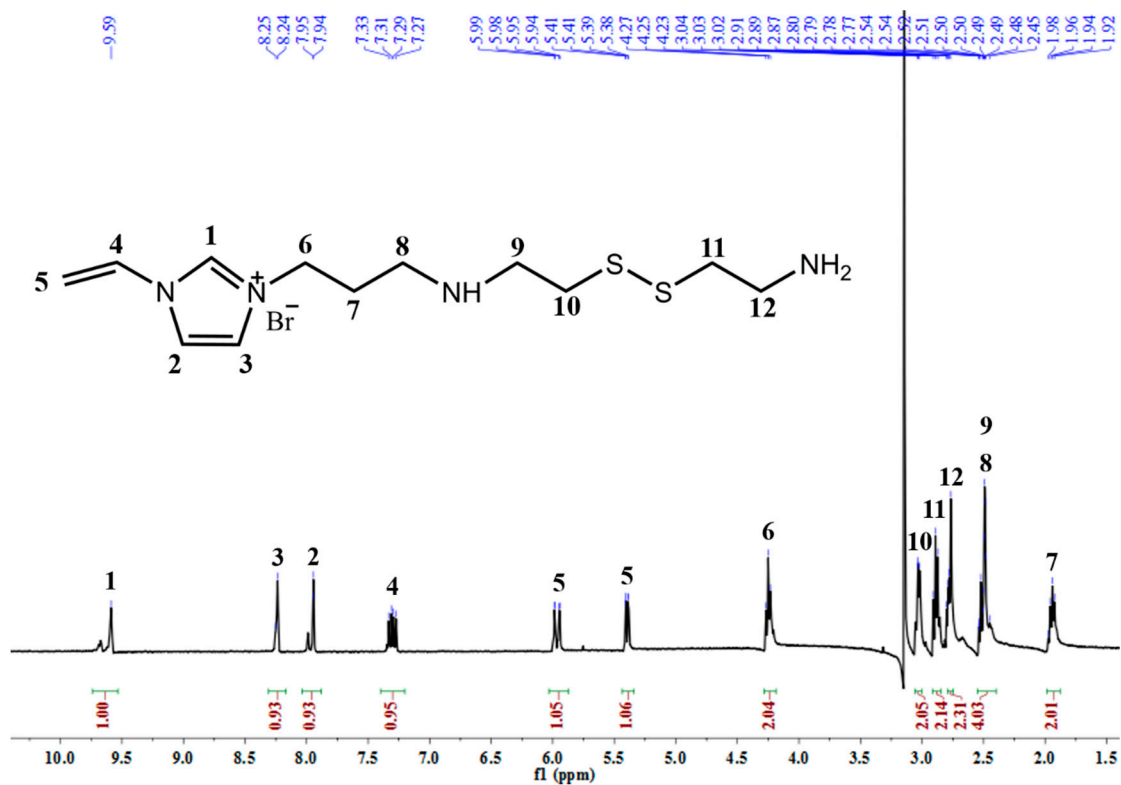

Fig. S 1. <sup>1</sup>H-NMR spectrum of (Cys)VIMBF<sub>4</sub> ionic liquid (solvent: Methanol-*d*<sub>4</sub>)

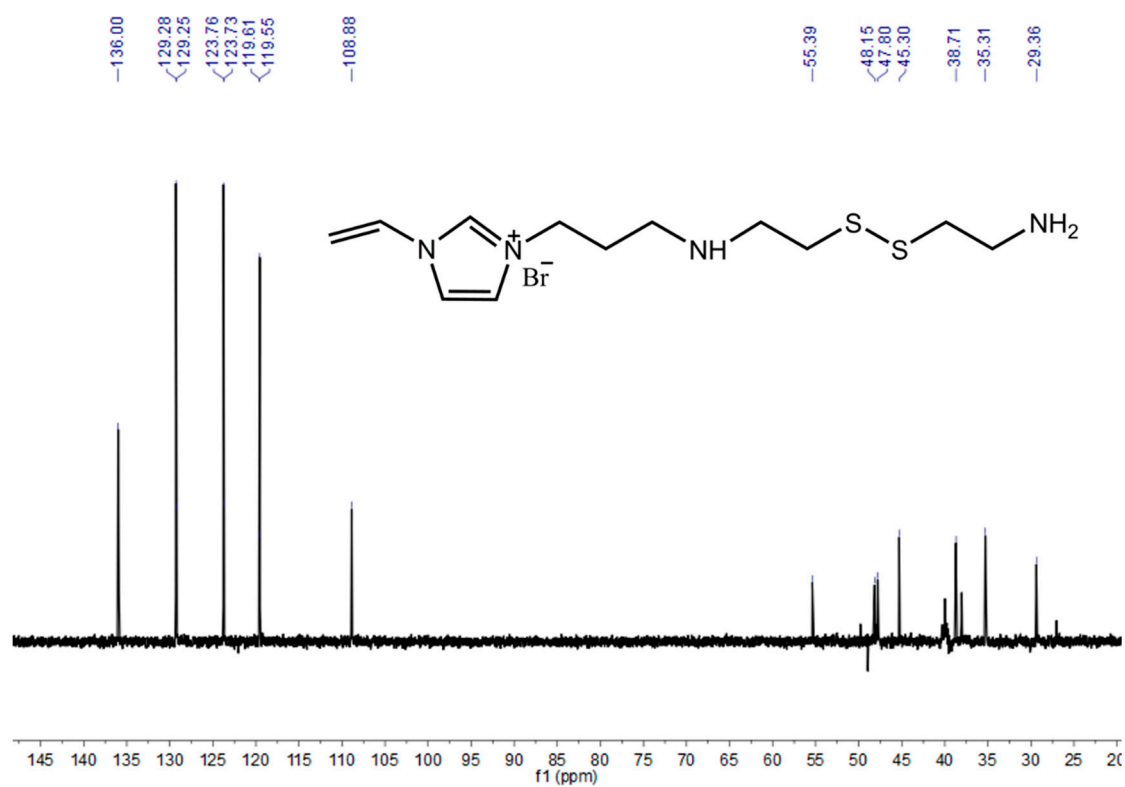

Fig. S 2. <sup>13</sup>C-NMR spectrum of (Cys)VIMBF<sub>4</sub> ionic liquid (solvent: Methanol-*d*<sub>4</sub>)

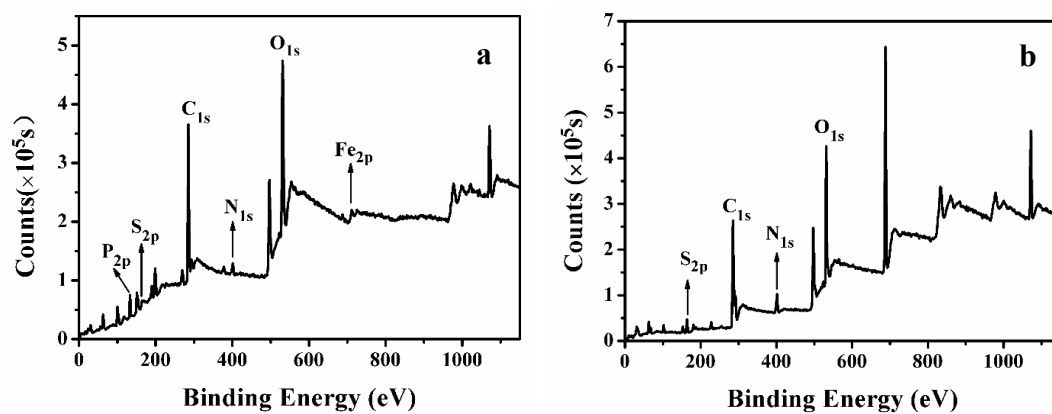

Fig. S3. X-ray photoelectron spectroscopic characterizations of imprinted (a) and non-imprinted polymers (b)

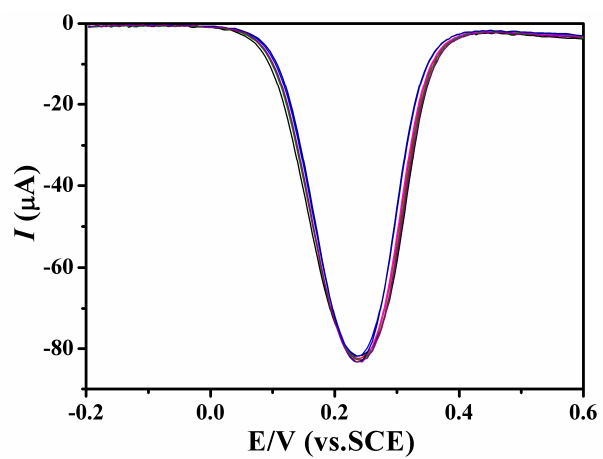

Fig. S 4 Differential pulse voltammograms of  $\text{K}_4\text{Fe}(\text{CN})_6/\text{K}_3\text{Fe}(\text{CN})_6$  at the NIP sensor with AFP concentration varying from 0.03 to 1.0  $\text{ng mL}^{-1}$

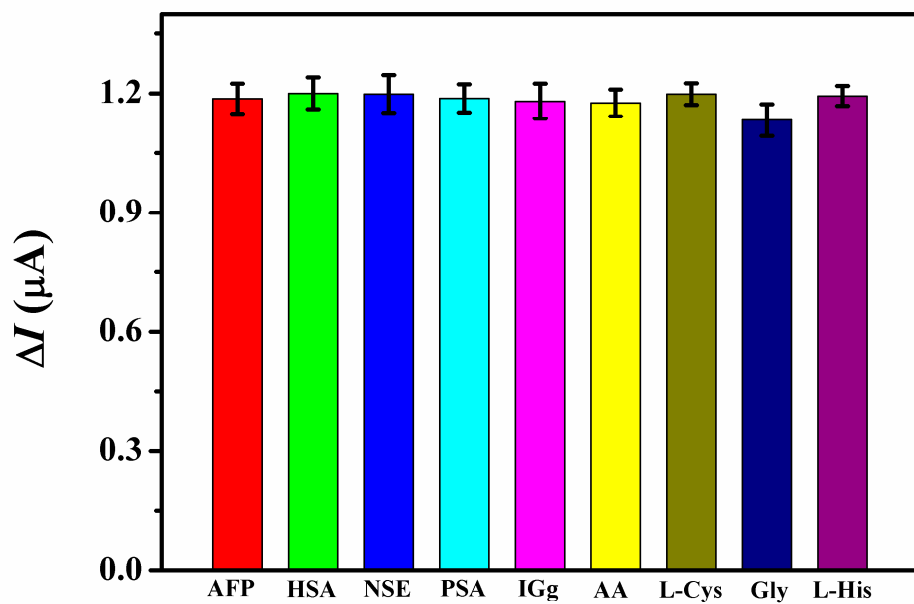

Fig. S 5. Electrochemical responses of the imprinted sensor toward  $1.0 \text{ ng mL}^{-1}$  AFP in the presence of  $50 \text{ ng mL}^{-1}$  HSA, NSE, PSA, IGg, L-Cys, Gly and L-His.
